# Supplementary material for: Comprehensive Analysis of NAC Genes Reveals Differential Expression Patterns in Response to Pst DC3000 and Their Overlapping Expression Pattern during PTI and ETI in Tomato
Source: MDPI journal article supplement (doi:10.3390/genes13112015), 2022-11-02
Supplement: s1 [file s1]

**Table S1. RT-qPCR primers of *SSLNAC* genes used in this study.**

| LoC            | gene name       | F                    | R                      |
|----------------|-----------------|----------------------|------------------------|
| Solyc02g069960 | <i>SSINAC1</i>  | TCCAAATAGTTCCCAGAT   | AGTTGCCATGTTCTAACC     |
| Solyc02g087920 | <i>SSINAC2</i>  | AAGACCTCCGAGTCCATA   | TCCTCAGCCAAACTAAAA     |
| Solyc04g005610 | <i>SSINAC3</i>  | TGGCTTCTAATGGACAAC   | ATGGCTTGATGAGGCATA     |
| Solyc04g009440 | <i>SSINAC4</i>  | TGTGACAAGGAGGTTCAG   | TGTCCTGGAAATTGTTGA     |
| Soly05g007550  | <i>SSINAC5</i>  | GTGGTGGTGGTGGTGTTC   | CATCAGCAGCCATATTCA     |
| Soly05g021090  | <i>SSINAC6</i>  | TTGGGGATGCAAGTTCTA   | TTTGTGGTTTCCTGGTTT     |
| Solyc05g007770 | <i>SSINAC7</i>  | TGATGACCAAGGTTACAC   | TGAGATTGAAATGTTGGA     |
| Solyc06g060230 | <i>SSINAC8</i>  | ATTCAGTTCCGAAGATGC   | GCTATTATCCACCGTTGTG    |
| Solyc07g006840 | <i>SSINAC9</i>  | GGAGGTGATTATGGTGAG   | CAAAGTTGTTTCGAGGTAG    |
| Soly07g045030  | <i>SSINAC10</i> | GTTACTACAATAATAGCCA  | GGCTAAATCAACGACAGA     |
| Solyc07g063420 | <i>SSINAC11</i> | TGAAGGTGGATCACAATA   | TGAGAAGACTTACGATAGAT   |
| Soly07g63410   | <i>SSINAC12</i> | AGTTAAGTTTGAAGGAGG   | CATATTTACTGTTTGGGTC    |
| Solyc08g007020 | <i>SSINAC13</i> | CTAAGGCTGGATACTGGA   | GAATCATAGCGAGGACA      |
| Solyc08g077110 | <i>SSINAC14</i> | CTTTCCCGAGTTTITAGAG  | GATTTGGATTCTCTGTTTG    |
| Solyc06g061080 | <i>SSINAC15</i> | ATCCTTCAAAGGAATGTC   | CGACTGAGAAGGGAGATA     |
| Solyc10g06880  | <i>SSINAC16</i> | TGGAATAACGACGAAGCA   | GAAATTGGCAATGGAGCT     |
| Solyc10g083450 | <i>SSINAC17</i> | AAGACGAGTTGGAAGATG   | TCGATAATTGGGAAAGTG     |
| Solyc11g017470 | <i>SSINAC18</i> | TCAACAAACCCATCTTCG   | TCGGCTTCGGCTCACTCT     |
| Solyc11g065540 | <i>SSINAC19</i> | GGGCGGAGGTATGGAATC   | CAAGAGGAAATGGTGGTG     |
| Solyc12g013620 | <i>SSINAC20</i> | G TTCAGGGTCAGGCTCAG  | CCCCTTTTCAACTTCTTC     |
| $\beta$ -actin | $\beta$ -actin  | GTCCTCTTCCAGCCATCCAT | ACCACTGAGCACAATGTTACCG |
